# Supplementary material for: Increasingly limited options for the treatment of enteric fever in travellers returning to England, 2014–2019: a cross-sectional analytical study
Source: PubMed Central journal article supplement — J Med Microbiol. 2021 Aug 5;70(8):001359. doi: 10.1099/jmm.0.001359 (PMC8513630; doi:10.1099/jmm.0.001359), 2021-08-05
Supplement: jmm-70-1359-s001.pdf [file jmm-70-1359-s001.pdf]

**Supplementary Table S1: Symptoms reported to Health Protection Team in enhanced surveillance of confirmed enteric fever cases in England 2014-2019 for whom symptoms could be ascertained (n=1789):**

| <b>Symptom</b>                     | <b>S. Typhi</b><br>(n=1025) |       | <b>S. Paratyphi A</b><br>(n=684) |       | <b>S. Paratyphi B</b><br>(n=80) |       | <b>Total</b><br>(n=1789) |       |
|------------------------------------|-----------------------------|-------|----------------------------------|-------|---------------------------------|-------|--------------------------|-------|
|                                    | n                           | (%)   | n                                | (%)   | n                               | (%)   | n                        | (%)   |
| Fever                              | 963                         | (94%) | 619                              | (91%) | 68                              | (85%) | 1650                     | (92%) |
| Diarrhoea                          | 664                         | (65%) | 379                              | (55%) | 57                              | (71%) | 1100                     | (61%) |
| Headache                           | 508                         | (50%) | 346                              | (51%) | 37                              | (46%) | 891                      | (50%) |
| Abdominal Pain                     | 440                         | (43%) | 282                              | (41%) | 46                              | (58%) | 768                      | (43%) |
| Vomiting                           | 422                         | (41%) | 214                              | (31%) | 32                              | (40%) | 668                      | (37%) |
| Rigors                             | 288                         | (28%) | 172                              | (25%) | 20                              | (25%) | 480                      | (27%) |
| Cough                              | 227                         | (22%) | 127                              | (19%) | 11                              | (14%) | 365                      | (20%) |
| Constipation                       | 72                          | (7%)  | 63                               | (9%)  | 4                               | (5%)  | 139                      | (8%)  |
| Rash                               | 39                          | (4%)  | 20                               | (3%)  | 3                               | (4%)  | 62                       | (3%)  |
| <i>Any GI Symptom</i> <sup>1</sup> | 837                         | (82%) | 504                              | (74%) | 67                              | (84%) | 1408                     | (79%) |
| <i>Asymptomatic</i>                | 6                           | (1%)  | 8                                | (1%)  | 1                               | (1%)  | 15                       | (1%)  |

<sup>1</sup>Diarrhoea, abdominal pain, vomiting, or constipation.

**Supplementary Table S2: Univariable analysis of *Salmonella* Typhi resistance to ciprofloxacin(n=1025):**

| Characteristic         | Group         | n                | (%)   | OR          | 95% CI       | P-value |
|------------------------|---------------|------------------|-------|-------------|--------------|---------|
|                        |               | <b>Resistant</b> |       |             |              |         |
| Gender                 | Female        | 441              | (90%) | 1.00        | .            | 0.145   |
|                        | Male          | 497              | (93%) | 1.39        | (0.89-2.16)  |         |
| Age Group              | Adult (≥18yr) | 582              | (90%) | 1.00        |              | 0.019   |
|                        | Child (<18yr) | 356              | (94%) | 1.81        | (1.09-2.99)  |         |
| Deprivation            | 1 Most dep.   | 281              | (89%) | 1.00        | .            | 0.052*  |
|                        | 2             | 251              | (91%) | 1.23        | (0.71-2.14)  |         |
|                        | 3             | 150              | (94%) | 1.76        | (0.84-3.68)  |         |
|                        | 4             | 98               | (92%) | 1.28        | (0.59-2.77)  |         |
|                        | 5 Least dep.  | 90               | (96%) | 2.64        | (0.91-7.71)  |         |
| UK Born                | No            | 513              | (90%) | 1.00        | .            | 0.080   |
|                        | Yes           | 366              | (93%) | 1.54        | (0.95-2.50)  |         |
| VFR <sup>1</sup>       | No            | 161              | (87%) | 1.00        |              | 0.009   |
|                        | Yes           | 712              | (93%) | 1.94        | (1.17-3.21)  |         |
| Travel-associated      | Direct        | 929              | (92%) | 1.00        |              | <0.001  |
|                        | Propagated    | 9                | (69%) | 0.20        | (0.06-0.67)  |         |
| <b>Source Location</b> |               |                  |       |             |              |         |
| India                  | No            | 546              | (88%) | 1.00        |              | <0.001  |
|                        | Yes           | 392              | (96%) | <b>3.45</b> | (1.93-6.14)  |         |
| Pakistan               | No            | 521              | (87%) | 1.00        |              | <0.001  |
|                        | Yes           | 417              | (98%) | <b>6.16</b> | (3.11-12.21) |         |
| Bangladesh             | No            | 870              | (92%) | 1.00        |              | 0.295   |
|                        | Yes           | 68               | (88%) | <b>0.68</b> | (0.33-1.41)  |         |
| Other Asia             | No            | 897              | (93%) | 1.00        |              | <0.001  |
|                        | Yes           | 41               | (67%) | <b>0.15</b> | (0.08-0.28)  |         |
| Africa                 | No            | 904              | (93%) | 1.00        |              | <0.001  |
|                        | Yes           | 34               | (60%) | <b>0.10</b> | (0.06-0.19)  |         |

\*Chi-squared test for trend. <sup>1</sup>Visiting friends and relatives.

**Supplementary Table S3: Univariable analysis of resistance of *Salmonella* Typhi to amoxicillin, chloramphenicol, co-trimoxazole, and ciprofloxacin (MDR+FQ; n=1024):**

| Characteristic         | Group         | n                | (%)   | OR          | 95% CI       | P-value |
|------------------------|---------------|------------------|-------|-------------|--------------|---------|
|                        |               | <b>Resistant</b> |       |             |              |         |
| Gender                 | Female        | 121              | (25%) | 1.00        | .            | 0.128   |
|                        | Male          | 155              | (29%) | 1.24        | (0.94-1.64)  |         |
| Age Group              | Adult (≥18yr) | 146              | (23%) | 1.00        | .            | <0.001  |
|                        | Child (<18yr) | 130              | (34%) | 1.80        | (1.35-2.38)  |         |
| Deprivation            | 1 Most dep.   | 114              | (36%) | 1.00        | .            | <0.001* |
|                        | 2             | 68               | (25%) | 0.58        | (0.40-0.83)  |         |
|                        | 3             | 32               | (20%) | 0.44        | (0.28-0.69)  |         |
|                        | 4             | 28               | (26%) | 0.62        | (0.38-1.02)  |         |
|                        | 5 Least dep.  | 15               | (16%) | 0.33        | (0.18-0.61)  |         |
| UK Born                | No            | 133              | (23%) | 1.00        | .            | 0.010   |
|                        | Yes           | 121              | (31%) | 1.46        | (1.09-1.95)  |         |
| VFR <sup>1</sup>       | No            | 33               | (18%) | 1.00        | .            | 0.002   |
|                        | Yes           | 224              | (29%) | 1.89        | (1.26-2.85)  |         |
| Travel-associated      | Direct        | 272              | (27%) | 1.00        | .            | 0.755   |
|                        | Propagated    | 4                | (31%) | 1.21        | (0.37-3.96)  |         |
| <b>Source Location</b> |               |                  |       |             |              |         |
| India                  | No            | 267              | (43%) | 1.00        | .            | <0.001  |
|                        | Yes           | 9                | (2%)  | <b>0.03</b> | (0.01-0.06)  |         |
| Pakistan               | No            | 54               | (9%)  | 1.00        | .            | <0.001  |
|                        | Yes           | 222              | (52%) | <b>10.9</b> | (7.41-16.00) |         |
| Bangladesh             | No            | 257              | (27%) | 1.00        | .            | 0.640   |
|                        | Yes           | 19               | (25%) | <b>0.88</b> | (0.51-1.51)  |         |
| Other Asia             | No            | 260              | (27%) | 1.00        | .            | 0.896   |
|                        | Yes           | 16               | (26%) | <b>0.96</b> | (0.53-1.73)  |         |
| Africa                 | No            | 259              | (27%) | 1.00        | .            | 0.615   |
|                        | Yes           | 17               | (30%) | <b>1.16</b> | (0.65-2.09)  |         |

\*Chi-squared test for trend. <sup>1</sup>Visiting friends and relatives.

**Supplementary Table S4: Univariable analysis of *Salmonella* Paratyphi A resistance to ciprofloxacin (n=704):**

| Characteristic         | Group         | n                | (%)    | OR          | 95% CI       | P-value |
|------------------------|---------------|------------------|--------|-------------|--------------|---------|
|                        |               | <b>Resistant</b> |        |             |              |         |
| Gender                 | Female        | 343              | (98%)  | 1.00        | .            | 0.815   |
|                        | Male          | 344              | (97%)  | 0.89        | (0.34-2.34)  |         |
| Age Group              | Adult (≥18yr) | 555              | (99%)  | 1.00        | .            | 0.166   |
|                        | Child (<18yr) | 132              | (97%)  | 3.81        | (0.50-29.07) |         |
| Deprivation            | 1 Most dep.   | 212              | (98%)  | 1.00        | .            | 0.031*  |
|                        | 2             | 194              | (99%)  | 4.57        | (0.53-39.85) |         |
|                        | 3             | 117              | (99%)  | 2.76        | (0.32-24.05) |         |
|                        | 4             | 66               | (96%)  | 0.52        | (0.12-2.24)  |         |
|                        | 5 Least dep.  | 72               | (94%)  | 0.34        | (0.09-1.22)  |         |
| UK Born                | No            | 361              | (98%)  | 1.00        | .            | 0.321   |
|                        | Yes           | 281              | (97%)  | 0.61        | (0.22-1.65)  |         |
| VFR <sup>1</sup>       | No            | 147              | (94%)  | 1.00        | .            | <0.001  |
|                        | Yes           | 497              | (99%)  | 5.63        | (1.99-15.95) |         |
| Travel-associated      | Direct        | 682              | (98%)  | 1.00        | .            | 0.724   |
|                        | Propagated    | 5                | (100%) | .           | .            |         |
| <b>Source Location</b> |               |                  |        |             |              |         |
| India                  | No            | 345              | (96%)  | 1.00        | .            | 0.002   |
|                        | Yes           | 342              | (99%)  | <b>7.43</b> | (1.67-33.13) |         |
| Pakistan               | No            | 456              | (97%)  | 1.00        | .            | 0.016   |
|                        | Yes           | 231              | (99%)  | <b>8.11</b> | (1.06-62.10) |         |
| Bangladesh             | No            | 618              | (97%)  | 1.00        | .            | 0.571   |
|                        | Yes           | 69               | (99%)  | <b>1.79</b> | (0.23-13.70) |         |
| Other Asia             | No            | 628              | (99%)  | 1.00        | .            | <0.001  |
|                        | Yes           | 59               | (86%)  | <b>0.07</b> | (0.02-0.19)  |         |
| Africa                 | No            | 684              | (98%)  | 1.00        | .            | <0.001  |
|                        | Yes           | 3                | (43%)  | <b>0.01</b> | (0.003-0.08) |         |

\*Chi-squared test for trend. <sup>1</sup>Visiting friends and relatives.
